# Supplementary material for: A robot-assisted acoustofluidic end effector
Source: PubMed Central journal article supplement (PMC9605990; doi:10.1038/s41467-022-34167-y), 2022-10-26
Supplement: 41467_2022_34167_MOESM2_ESM.pdf [file 41467_2022_34167_MOESM2_ESM.pdf]

## Description of Additional Supplementary Files

**Supplementary Movie 1.** Programmed movement of the 5-axis Dorna robotic arm.

**Supplementary Movie 2.** Acoustic out-of-plane streaming around the pulled glass capillary at excitation frequency and amplitude of **207 kHz** and **5 V<sub>PP</sub>**, respectively.

**Supplementary Movie 3.** Tracer particles travelling around the tailoring acoustofluidic device while acoustics is applied at an excitation frequency and amplitude of **240 kHz** and **2.5 V<sub>PP</sub>**, respectively. The particles group up at equally spaced positions along the capillary.

**Supplementary Movie 4.** Acoustic sharp edge streaming at the tip of the pulled glass capillary at different excitation frequencies and amplitude of **1–3 V<sub>PP</sub>**, respectively.

**Supplementary Movie 5.** Acoustic activated tip movement in air at excitation frequency and amplitude of **6.8 kHz** and **20 V<sub>PP</sub>** (top), and **7.8 kHz** and **20 V<sub>PP</sub>** (bottom), respectively.

**Supplementary Movie 6.** Trajectory control of the in action acoustofluidic device using the robotic arm. Acoustic circular streaming profile of the acoustofluidic device at excitation frequency and amplitude of **140 kHz** and **1.3 V<sub>PP</sub>**, respectively.

**Supplementary Movie 7.** Particle trapping of 2, 10, and 15 microns polystyrene particles around glass capillary.

**Supplementary Movie 8.** Acoustic activated capillary movement in air at excitation frequency and amplitude of **200 kHz** and **20 V<sub>PP</sub>**. The oscillation of the capillary resembles a standing wave with a wavelength of  $\lambda = \sim 90 \mu\text{m}$ .

**Supplementary Movie 9.** Attracting and grabbing of a zebrafish larva by trapping the swim bladder at the sharp tip of the glass capillary while applying acoustics. The zebrafish larva is released once the acoustics are turned off.

**Supplementary Movie 10.** The acoustofluidic device as a liquid micropump, creating a fluid flow in a spiral PDMS microchannel. The acoustofluidic device was activated at excitation frequency and amplitude of **134 kHz** and **10 V<sub>PP</sub>**, respectively.

**Supplementary Movie 11.** Droplet stretching and merging of two separated droplets using the acoustofluidic device in combination with the robotic arm at excitation frequency and amplitude of **44.9 kHz** and **20 V<sub>PP</sub>**, respectively.

**Supplementary Movie 12.** Droplet viscous mixing using the acoustofluidic device in combination with the robotic arm at excitation frequency and amplitude of **44.9 kHz** and **20 V<sub>PP</sub>**, respectively.

**Supplementary Movie 13.** High throughput viscous mixing of a 96-well plate using acoustics and a robotic arm at excitation frequency and amplitude of **240 kHz** and **20 V<sub>PP</sub>**, respectively.

**Supplementary Data 1:** MATLAB Code to control the Dorna Robotic Arm.
